# Supplementary material
Source: PubMed Central journal article supplement (PMC7295594)
Supplement: jexbio-223-224121-s1.pdf [file jexbio-223-224121-s1.pdf]

## Supplemental Data

[Click here to Download Dataset 1 and 2](#)
